# Supplementary material
Source: PubMed Central journal article supplement (PMC2720813)
Supplement: gfn271_1.pdf [file gfn271_1.pdf]

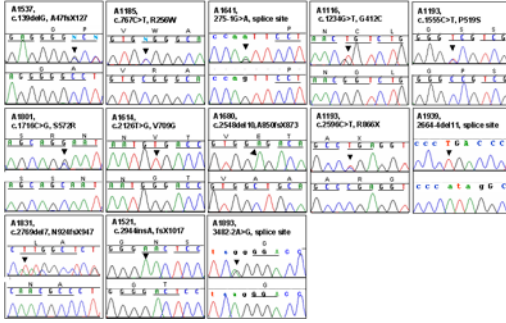

| Exon# | S. phlei sequence       | E. phlei sequence      |
|-------|-------------------------|------------------------|
| 1-2   | GAAGACGAGGAGGAGGAGG     | GTATGCTGAGGAGGAGG      |
| 3-4   | GGGACCTCTAGAGGTAG       | TCAGGACACACACCTTTC     |
| 5     | CGACTGTAGAGGTTCCAG      | AGCTTGTGTTGCACTCC      |
| 6-7   | GGTACATCCCAATCTTTC      | CTGAGACAGGACAGACC      |
| 8     | ACTCAATGCTTAGAGGTT      | CGATGAGGACATATTGAG     |
| 9     | CGAGTCTTCTCTGTGAG       | CGCTTCCATATCCAGAGTC    |
| 10-11 | TGATCTAGGCTTAGAGG       | TCGAGATTTCCCAAGATTC    |
| 12    | AGCAGTGGGCAAGGTAG       | CGAGGTTCTCTGTTTC       |
| 13-14 | AGACTGCGCGAGGCTT        | CATTGAGCTTAGGATTC      |
| 15-16 | TGAGCTTGAAGCTTTC        | AGCTTCCCAATGAGAGAC     |
| 17    | TAGTACATCTGAGCTT        | CGGAGGATTTGAGGAGG      |
| 18-19 | ACAGAGGAGCAATTTGAG      | CTTCTTGGAGGAGCTT       |
| 20    | TGGATCAGAGATGTTCTAG     | TTTGGAGAGATGAGGAGG     |
| 21-22 | GGTAAAGTTGAGGAGGAT      | CAGTAACTCTATGAGGAGGATA |
| 23    | ATGAAATATAGGCTTAGAGGAGG | CAGAGGAGGAGGAGGAGG     |
| 24-25 | TCAAGGCTGAGGTTTTC       | ATGAGCTTATGAGGAGG      |
| 26-27 | CAAGTATATCTGAGGTTTC     | GTGAGGCTTATGAGGAGG     |
| 28    | GGGAGGCTTATGAGG         | TGAGGAGGAGGAGGAGG      |
